# Supplementary material
Source: ML conference proceedings conference paper supplement (https://openreview.net/forum?id=YjFEzenFO)
Supplement: supplementary_material [file attachment]

---

# CodeRL: Mastering Code Generation through Pretrained Models and Deep Reinforcement Learning

## Supplementary

---

Anonymous Author(s)

Affiliation

Address

email

### 1 A Overview of Critic Model

2 Figure 1 shows an overview of our critic model. In our CodeRL framework, besides the actor LM  
 3 network  $\theta$ , we introduce a critic model that is trained as an error predictor and parameterized as  
 4 a neural network with parameters  $\phi$ . The critic receives as inputs a problem description  $D$  and  
 5 a corresponding synthetic program  $W^S$  sampled from the actor. The critic is required to output  
 6 a prediction of the unit test outcome of the input program. We define 4 possible outcomes  $u$ :  
 7 *CompileError*, *RuntimeError*, *FailedTest*, and *PassedTest*. The critic model is trained by minimizing  
 8 the following loss:

$$\mathcal{L}_{critic}(\phi) = -\log p_{\phi}(u|W^s, D) \quad (1)$$

9 The ground-truth outcome of a synthetic sample is obtained by passing it to the unit tests correspond-  
 10 ing to the problem. Note that since our critic model is applied in a supervised learning environment  
 11 with available ground truth, we also use the training samples from the original dataset with ground  
 12 truth output  $u = \text{PassedTest}$  to train the critic.

13 The learned hidden state representations of program tokens when passed through the critic are then  
 14 used to measure their return estimates for our RL optimization objective. The return estimates are  
 15 incorporated as intermediate returns at decoding steps to compute the expected gradient of the actor  
 16 network  $\nabla_{\theta} \mathcal{L}_{rl}(\theta)$ .

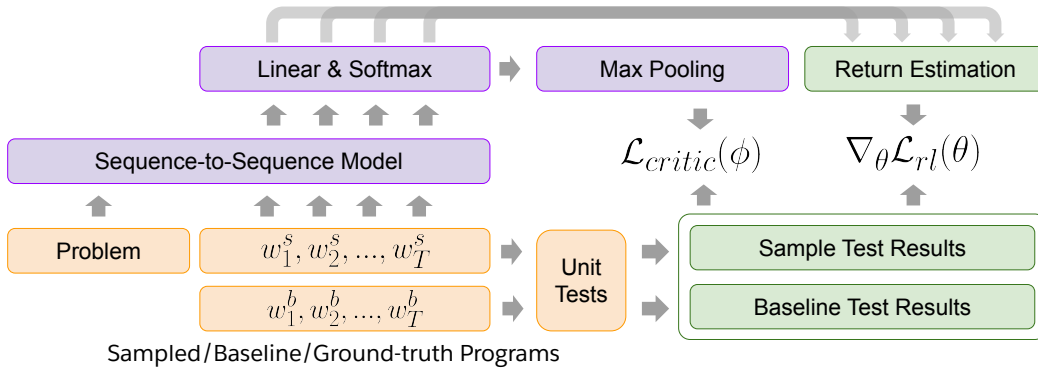

Figure 1: Overview of the critic model learning

## 17 B Additional Experimental Setup Details

18 **Pretraining Setup** For CodeT5, we adopt the code-specific tokenizer as described by Wang et al.  
19 [2021]. Note that we employ 6 programming languages (PLs) in CodeSearchNet [Husain et al., 2019]  
20 (CSN) instead of 8 PLs in CodeT5 as C/C# datasets are not publicly available. We employ only the  
21 pretraining task of masked span prediction (MSP) in CodeT5 and hence, we do not have to parse  
22 programs into abstract syntax trees (ASTs) to obtain the identifier information. This preprocessing  
23 step was required in other original pretraining tasks like masked identifier prediction [Wang et al.,  
24 2021]. To further speed up training, we concatenate data samples to batch size 512 for pretraining  
25 with MSP and the resulting number of tokens is 1.1B.

26 **APPS Benchmark** We follow the same preprocessing step as Hendrycks et al. [2021] to formu-  
27 late the input sequences from problem descriptions. APPS consists of 10,000 coding problems  
28 with a 50-50 train-test split. Each problem is accompanied by 23.2 correct Python programs and  
29 21.2 unit tests on average. The average length per problem is 293.2 words and the average length  
30 per program is 18.0 lines. The dataset is categorized into three levels of difficulty: Introduc-  
31 tory (3639, train/test=2639/100), Interview (5000, train/test=2000/3000), and Competition (1361,  
32 train/test=361/1000). Similar to [Hendrycks et al., 2021], we employ the strict accuracy to evaluate  
33 the functional correctness of a program, where it is counted as correct if it can pass all the unit tests  
34 corresponding to the problem.

35 **MBPP Benchmark** We additionally include another smaller and simpler Python program synthesis  
36 dataset called MBPP [Austin et al., 2021] (Mostly Basic Programming Problems) for evaluation. The  
37 dataset contains 974 instances with 374/90/500 instances for training/validation/testing respectively  
38 and 10 reserved for few-shot learning. The problems are typically short, usually one sentence of  
39 natural language descriptions each. Each problem is accompanied by 1 correct solution (6.8 lines  
40 of code on average) and 3 unit tests in the form of `assert` statements for validating the functional  
41 correctness. Unlike APPS, unit tests in MBPP are not hidden and are explicitly incorporated into the  
42 source sequences for program synthesis models. This might encourage models to be overfitting to  
43 these `assert` statements via hard-coding an if-expression very occasionally. However, for a fair  
44 comparison with the baselines, we construct the source sequences in the same way as prior work.  
45 Specifically, we adopt the same prompt format as Austin et al. [2021] to prepare the input sequence  
46 as: problem descriptions + “Your code should satisfy these tests:” + 3 `assert` statements.

47 **Finetuning Setup** Following [Bahdanau et al., 2016], since our RL method is applied in a su-  
48 pervised learning task, in addition to synthetic programs, we also use the ground-truth programs  
49 of training samples to train the critic. These samples are considered perfect programs and always  
50 have a label of *PassedTest*. To optimize the LM actor network, in practice, following previous work  
51 [Bahdanau et al., 2016, Rennie et al., 2017, Wang et al., 2018], in each training optimization step, we  
52 can simply approximate the expected gradient with a single sample  $W_s \sim p_\theta$ :

$$\nabla_\theta \mathcal{L}_{rl}(\theta) \approx -(r(W^s) - r(W^b)) \sum_t \hat{q}_\phi(w_t^s) \nabla_\theta \log p_\theta(w_t^s | w_{1:t-1}^s, D) \quad (2)$$

53 **Configurations** For pretraining, we perform our experiments on a kubernetes with 16 A100-40G  
54 GPUs on Google Cloud Platform and the total pretraining duration is around 21 days. In the first  
55 pretraining stage with MSP, we employ a corruption rate of 15%, a peak learning rate (LR) of  $2e-4$ ,  
56 and a batch size of 2048. We pretrain on CSN for 150 epochs (10 days) and then on GCPY for  
57 10 epochs (5 days). For the second stage pretraining with NTP, we adopt a peak LR of  $1e-4$  and a  
58 batch size of 256, and pretrain for 10 epochs (6 days). We set the maximum length to 768 and 600  
59 for source and target sequences respectively for this objective. For all experiments, we employ an  
60 AdamW optimizer [Loshchilov and Hutter, 2019] with a 0.05 weight decay and a linear decay LR  
61 scheduler with a warmup step of 1000.

62 For finetuning on APPS, we adopt a batch size of 64 and warmup LR from 0 to  $2e-5$  for the first 500  
63 steps and polynomially (power=0.5) decay to  $1e-5$  until the end of 10 epochs, which takes around 30

Table 1: Code-to-Text generation results (smoothed BLEU-4) on CodeXGLUE

| Model        | Ruby         | JavaScript   | Go           | Python       | Java         | PHP          | Overall      |
|--------------|--------------|--------------|--------------|--------------|--------------|--------------|--------------|
| RoBERTa      | 11.17        | 11.90        | 17.72        | 18.14        | 16.47        | 24.02        | 16.57        |
| CodeBERT     | 12.16        | 14.90        | 18.07        | 19.06        | 17.65        | 25.16        | 17.83        |
| DOBF         | -            | -            | -            | 18.24        | 19.05        | -            | -            |
| PLBART       | 14.11        | 15.56        | 18.91        | 19.30        | 18.45        | 23.58        | 18.32        |
| CoText       | 14.02        | 14.96        | 18.86        | 19.73        | 19.06        | 24.58        | 18.55        |
| CodeT5-small | 14.87        | 15.32        | 19.25        | 20.04        | 19.92        | 25.46        | 19.14        |
| CodeT5-base  | 15.24        | 16.16        | 19.56        | 20.01        | 20.31        | 26.03        | 19.55        |
| CodeT5-large | <b>15.58</b> | <b>16.17</b> | <b>19.69</b> | <b>20.57</b> | <b>20.74</b> | <b>26.49</b> | <b>19.87</b> |

Table 2: Text-to-Code generation results on CodeXGLUE

| Model           | EM           | BLEU-4       | CodeBLEU     |
|-----------------|--------------|--------------|--------------|
| GPT-2           | 17.35        | 25.37        | 29.69        |
| CodeGPT-2       | 18.25        | 28.69        | 32.71        |
| CodeGPT-adapted | 20.10        | 32.79        | 35.98        |
| PLBART          | 18.75        | 36.69        | 38.52        |
| CoText          | 20.10        | 37.40        | 40.14        |
| UniXcoder       | 22.60        | 38.23        | -            |
| CodeT5-small    | 21.55        | 38.13        | 41.39        |
| CodeT5-base     | 22.30        | 40.73        | 43.20        |
| CodeT5-large    | <b>22.65</b> | <b>42.66</b> | <b>45.08</b> |

Table 3: Code-to-Code generation results on CodeXGLUE

| Model          | Java to C#   |              | C# to Java   |              | Refine Small |              | Refine Medium |              |
|----------------|--------------|--------------|--------------|--------------|--------------|--------------|---------------|--------------|
|                | BLEU-4       | EM           | BLEU-4       | EM           | BLEU-4       | EM           | BLEU-4        | EM           |
| Naive copy     | 18.54        | 0.00         | 18.69        | 0.00         | 78.06        | 0.00         | 90.91         | 0.00         |
| Roberta (code) | 77.46        | 56.10        | 71.99        | 57.90        | 77.30        | 15.90        | 90.07         | 4.10         |
| CodeBERT       | 79.92        | 59.00        | 72.14        | 58.00        | 77.42        | 16.40        | 91.07         | 5.20         |
| GraphCodeBERT  | 80.58        | 59.40        | 72.64        | 58.80        | <b>80.02</b> | 17.30        | <b>91.31</b>  | 9.10         |
| PLBART         | 83.02        | 64.60        | 78.35        | 65.00        | 77.02        | 19.21        | 88.50         | 8.98         |
| CoText         | -            | -            | -            | -            | 77.79        | 21.03        | 88.40         | 13.11        |
| NSEdit         | -            | -            | -            | -            | 71.06        | <b>24.04</b> | 85.72         | 13.87        |
| CodeT5-small   | 82.98        | 64.10        | 79.10        | 65.60        | 76.23        | 19.06        | 89.20         | 10.92        |
| CodeT5-base    | <b>84.03</b> | 65.90        | <b>79.87</b> | 66.90        | 77.43        | 21.61        | 87.64         | 13.96        |
| CodeT5-large   | 83.56        | <b>66.00</b> | 79.77        | <b>67.00</b> | 77.38        | 21.70        | 89.22         | <b>14.76</b> |

64 hours on one A100 GPU. We set the maximum source and target sequence length to 600 and 512  
65 respectively. For MBPP, due to its small training set, we finetune it for 60 epochs with a constant  
66 LR of  $2e-5$  and a batch size of 32, which takes less than 30 mins on one A100. We set its maximum  
67 source and target length to 382 and 306 respectively.

## 68 C Additional Experimental Results

### 69 C.1 CodeXGLUE Benchmark Results

70 To validate the effectiveness of our simplified pretraining strategies of CodeT5-large, we extensively  
71 evaluate it on a variety of generation tasks in CodeXGLUE [Lu et al., 2021], including code-to-text  
72 generation (i.e. summarization, see Table 1), text-to-code generation (see Table 2), and code-to-code  
73 generation (i.e., code translation and code refinement, see Table 3). Different from APPS [Hendrycks  
74 et al., 2021] and MBPP [Austin et al., 2021], we follow the default similarity-based evaluation  
75 metrics in the CodeXGLUE benchmark, including BLEU [Papineni et al., 2002] and CodeBLEU  
76 [Ren et al., 2020], and exact match (EM) scores. Table 1, 2, and 3 show that our simplified pretrained  
77 CodeT5-large sets new SOTA results on a large majority of the tasks, and hence, can be served as a

Table 4: Ablation results of CodeRL with different CodeT5 model variants with different sizes, pretraining data and objectives on MBPP. CodeT5<sup>†</sup> is finetuned on APPS and evaluated on MBPP in a zero-shot setting.

| Model                    | Size | Data    | Objective | <i>pass@80</i> | <i>pass@1000</i> |
|--------------------------|------|---------|-----------|----------------|------------------|
| GPT finetuned results    |      |         |           |                |                  |
| GPT                      | 224M | Web Doc | LM        | 7.2            | -                |
| GPT                      | 422M | Web Doc | LM        | 12.6           | -                |
| GPT                      | 1B   | Web Doc | LM        | 22.4           | -                |
| GPT                      | 4B   | Web Doc | LM        | 33.0           | -                |
| GPT                      | 8B   | Web Doc | LM        | 40.6           | -                |
| GPT                      | 68B  | Web Doc | LM        | 53.6           | -                |
| GPT                      | 137B | Web Doc | LM        | 61.4           | -                |
| CodeT5 finetuned results |      |         |           |                |                  |
| CodeT5                   | 60M  | CSN     | MSP       | 19.2           | 36.2             |
| CodeT5                   | 220M | CSN     | MSP       | 24.0           | 42.8             |
| CodeT5                   | 770M | CSN     | MSP       | 32.4           | 47.8             |
| CodeT5                   | 770M | +GCPY   | MSP       | 34.6           | 51.6             |
| CodeT5                   | 770M | +GCPY   | +NTP      | 46.8           | 66.2             |
| CodeRL zero-shot results |      |         |           |                |                  |
| CodeT5 <sup>†</sup>      | 770M | +GCPY   | +NTP      | 60.2           | 78.4             |
| +CodeRL                  | 770M | +GCPY   | +NTP      | 63.0           | 81.8             |

78 better foundation model for other code-related generation tasks. Note that in these experiments, we  
79 employ the conventional finetuning objective with  $\mathcal{L}_{ce}$  and there might be potential to improve the  
80 performance further with our CodeRL framework.

## 81 C.2 MBPP Benchmark Results

82 Following Austin et al. [2021], we adopt temperature sampling to generate multiple candidate  
83 solutions. We empirically find that CodeT5 benefits from a higher temperature of 1.2 (less greedy  
84 decoding or more diverse) than their GPT’s temperature of 0.5 on this benchmark.

85 Table 4 reports the *pass@80* and *pass@1000* results for both finetuned and zero-shot settings. For  
86 baselines, we compared with GPT models with sizes ranging from 224M to 137B [Austin et al.,  
87 2021], which are pretrained on 2.93B web documents (13.8M containing source code) using standard  
88 language modeling objective. Results of GPT models are obtained from the original authors. From  
89 the comparison among various CodeT5 variants, we again confirm that larger model sizes and  
90 pretraining data, and better pretraining objective of NTP all lead to a performance boost. Particularly,  
91 our CodeT5-770M yields a *pass@80* of 46.8%, surpassing GPT-8B’s 40.6% with a much smaller  
92 model size. In addition, we find CodeT5 models finetuned on APPS can achieve a surprisingly good  
93 zero-shot performance on MBPP with a *pass@80* of 60.2% and further improved to 63.0% with  
94 the help of CodeRL, which even outperforms the largest GPT-137B’s performance of 61.4%. This  
95 indicates APPS is a comprehensive program synthesis benchmark and CodeT5+CodeRL models  
96 trained on it are able to generalize to other simpler coding tasks. If we further increase the budget of  
97 attempts up to 1000, all models witness a consistent and significant boost of solving rate, especially  
98 our CodeT5+CodeRL yielding a new SOTA result of 81.8% *pass@1000*.

99 A common concern about transfer learning is that the source (APPS) and target (MBPP) tasks might  
100 have overlap in their training data, which could result into the source model tending to memorize  
101 these substantially similar data when applied to the target task. To address this concern, we analyze  
102 how many lines of code appear in both training set of APPS and programs of MBPP following Austin  
103 et al. [2021]. For this analysis, we discard code comments and normalize the whitespaces for each  
104 line, and then exclude lines that appear more than twice anywhere in MBPP, as these are likely to be  
105 common Python keywords such as `return` and `break`.

106 Figure 2 illustrates the number of absolute duplicated lines (Left) and relative fraction of duplicated  
107 lines (Right) in the MBPP programs. As can be seen, the overlap between APPS and MBPP seems to

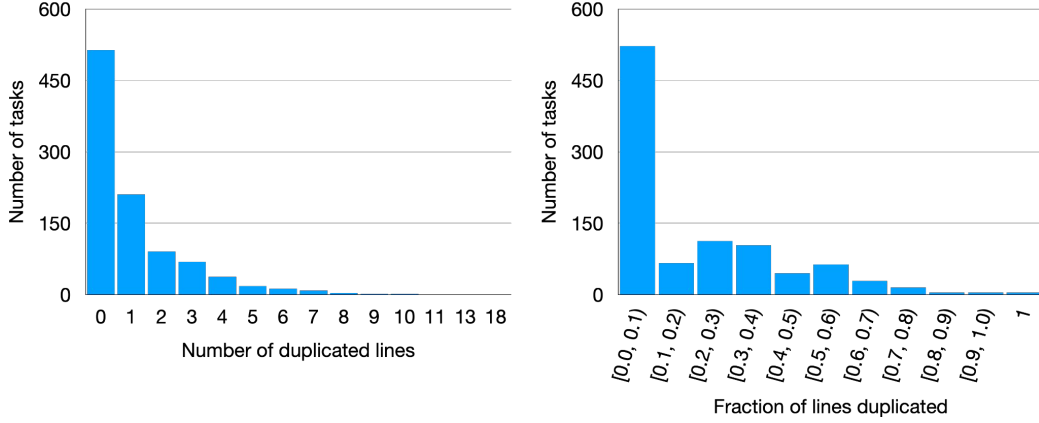

Figure 2: Analysis of duplicated lines between MBPP and APPS

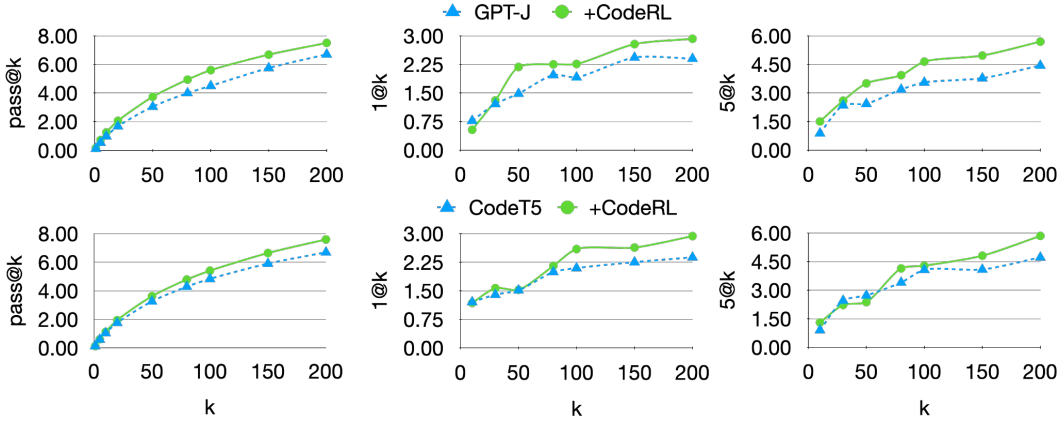

Figure 3: Results on APPS competition-level test samples of CodeRL+CodeT5 and CodeRL+GPT-J

be minimal. Only 12.6% MBPP programs have more than half of their lines matched somewhere in the APPS training data. Besides, more than half (514 out of 974) of programs have a zero overlap and 90.9% have only no more than 3 lines overlapped with the APPS training set. If we further require the lines to be consecutive, there are no more than 2 consecutive duplicated lines.

### C.3 APPS Benchmark Results on Competition-level Tasks

Figure 3 shows the results of  $pass@k$  and  $n@k$  with  $k$  ranging from 1 to 200 and  $n = \{1, 5\}$ , for CodeRL+CodeT5 and CodeT5 only. We choose to investigate a subset of the APPS test split, which contains the test samples of the highest difficulty level (i.e. competition programming tasks). Since CodeRL is model-agnostic, we also integrate it with GPT-J [Wang and Komatsuzaki, 2021] and report the results. To focus on the impact of our RL optimization, during test time, we compare models using only nucleus sampling and without the CS procedure. Figure 3 shows that the performance gains are quite consistent on both GPT-J and CodeT5. In particular, as  $k$  increases, the performance gain of CodeRL is more significant on both GPT-J and CodeT5 models. We attribute these gains to the CodeRL learning objective  $\mathcal{L}_{rl}$  that encourages models to explore code solutions drawn from the model’s sampling distribution. During test time with an increasing  $k$  sampling budget, models are allowed to generate diverse code solutions and the impact of  $\mathcal{L}_{rl}$  becomes more significant.

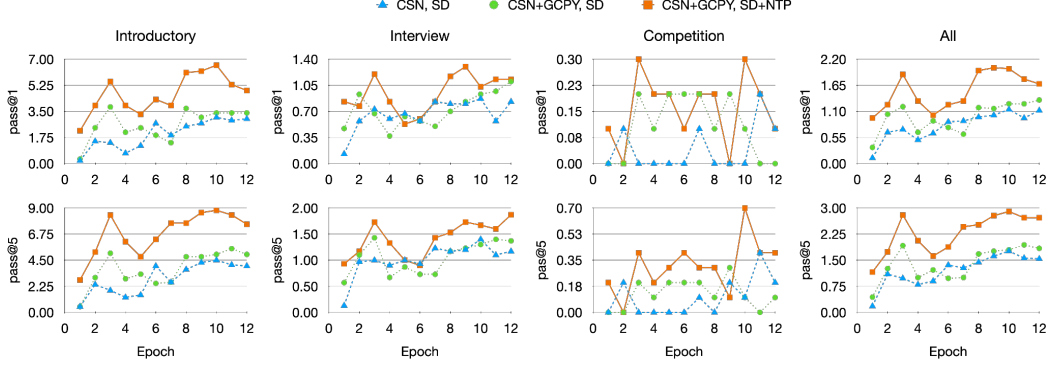

Figure 4: Ablation results by finetuning epochs of CodeT5-770M model variants on APPS

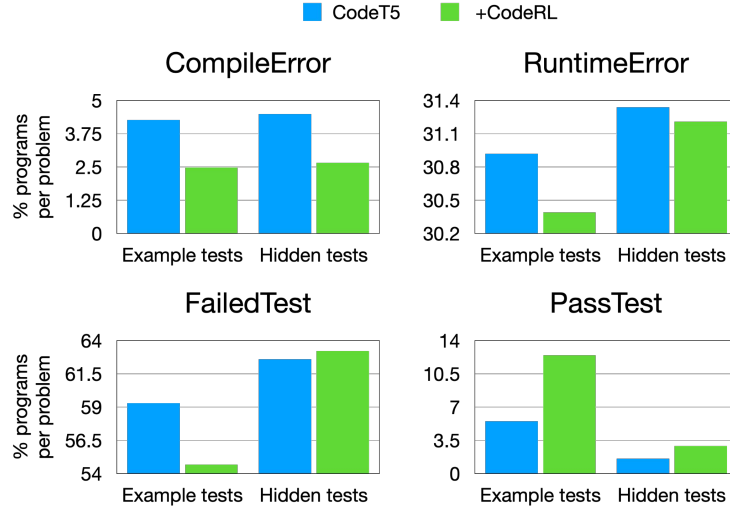

Figure 5: Qualitative results of CodeT5 and CodeT5+CodeRL: We generate 200 programs per test sample and report the % programs per sample by their unit test signals, including CompileError, RuntimeError, FailedTest, and PassedTest.

#### 124 C.4 CodeT5 Ablation by Training Epochs

125 Figure 4 shows the performance of CodeT5 model variants by finetuning epochs and by difficulty  
 126 levels of programming tasks. Note that in these experiments, we only need to compare among  
 127 CodeT5 model variants by pretraining strategies, and hence, only engage  $\mathcal{L}_{ce}$  (imitation learning)  
 128 in the finetuning stage on APPS. Consistent with our prior analysis (See §4.3 of the main paper),  
 129 enhancing both pretraining data (with larger data of GCPY) and pretraining objectives (with NTP  
 130 objective) improves model performance across training epochs in general. Moreover, as noted by our  
 131 analysis of learning objectives, only using  $\mathcal{L}_{ce}$  often leads to overfitting performance, typically after  
 132 epoch 10 in our case. Hence, to further finetune large-scale LMs, we recommend adopting our RL  
 133 objective  $\mathcal{L}_{rl}$  to utilize synthetic training samples and avoid overfitting models.

#### 134 C.5 Impacts of CodeRL on Program Quality by Unit Test Signals

135 Figure 5 demonstrates the average percentages of generated programs by their test signals. Specifically,  
 136 we use CodeT5 or CodeRL+CodeT5 to generate programs and randomly select 200 generated  
 137 programs per test sample in the APPS test split. We pass programs to either example unit tests or  
 138 hidden unit tests corresponding to the problem and group the output programs by their output signals,  
 139 including CompileError, RuntimeError, FailedTest, and PassedTest. We observe that integrating

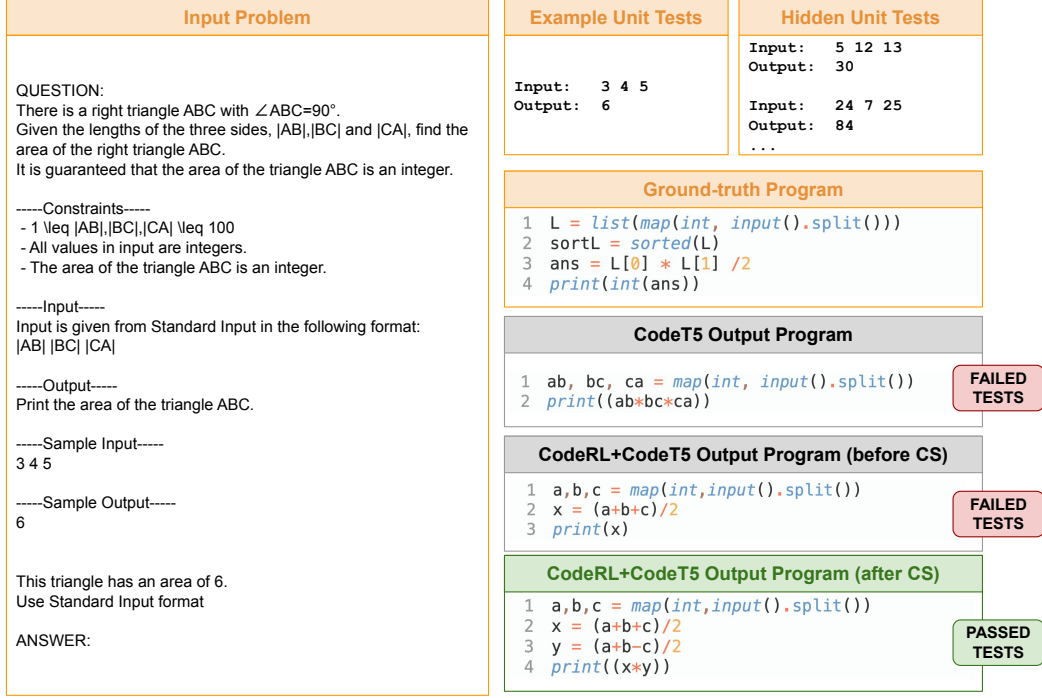

Figure 6: An example of an introductory-level program from the APPS benchmark and corresponding programs generated by CodeT5 variants

CodeRL can increase the likelihood that a program can pass unit tests, and reduces the likelihood that it fails one or more unit tests, or whether it contains compiling or runtime errors. However, we note that there are significant gaps in performance by test signals between example unit tests and hidden unit tests. This observation suggests that example tests are not as comprehensive as hidden tests and hence, applying our CS procedure might lead to false positive samples for regeneration. We recommend additional methods to improve example unit tests, such as through data augmentation by mutating input/output pairs [Austin et al., 2021].

## C.6 Example Generated Programs and Qualitative Analysis

Figure 6 to 8 show examples of programming problems from the APPS benchmark and corresponding programs generated by CodeT5 variants. Specifically, based on the same foundation pretrained CodeT5 (pretrained with GCPY data and NTP objective), we compare the CodeT5 model that is finetuned by  $\mathcal{L}_{ce}$  only and another model that follows our CodeRL framework. In CodeRL+CodeT5, we further show programs before and after applying the CS procedure. The example programs show that applying CodeRL can improve the quality of generated programs and the CS procedure further improves the functional correctness of the programs. For instance, in Figure 8, CodeT5 model misunderstands the problem and focuses on finding the greatest common divisor between  $a$  and  $b$  only. Instead, the CodeRL model avoids this mistake and tackles the problem based on the *factorials* of  $a$  and  $b$ . In Figure 7, we note that the CS procedure improves the program by reordering the `elif` code blocks. The resulting program is more correct and is able to pass all hidden unit tests.

We also found that CodeRL can improve the efficiency of the programs, an important quality in complex programming problems. For instance, in the interview-level programs in Figure 8, we note that without applying CS, the generated program is functionally correct but fails during execution due to a timeout error. Applying the CS procedure can condition models on parts of the prior program and (re)generates new tokens to produce a more efficient program. Hence, the resulting final program is able to pass all hidden unit tests (including tests with extremely large values) without timeout errors.

| Input Problem                                                                                                                                                                                                                                                                                                                                                                                                                                                                                                                                                                                                                                                                                                                                                                                                                                                                                                                                                                                                                                                                                                                                                                                                                                      | Example Unit Tests                                                                                                                                                                                                                                                                                                                                                                                                                                                                                                                                                                                                        | Hidden Unit Tests                                                                                                                                                                                                                                                                                                                                                                                                                                                                                                                                                                                               |
|----------------------------------------------------------------------------------------------------------------------------------------------------------------------------------------------------------------------------------------------------------------------------------------------------------------------------------------------------------------------------------------------------------------------------------------------------------------------------------------------------------------------------------------------------------------------------------------------------------------------------------------------------------------------------------------------------------------------------------------------------------------------------------------------------------------------------------------------------------------------------------------------------------------------------------------------------------------------------------------------------------------------------------------------------------------------------------------------------------------------------------------------------------------------------------------------------------------------------------------------------|---------------------------------------------------------------------------------------------------------------------------------------------------------------------------------------------------------------------------------------------------------------------------------------------------------------------------------------------------------------------------------------------------------------------------------------------------------------------------------------------------------------------------------------------------------------------------------------------------------------------------|-----------------------------------------------------------------------------------------------------------------------------------------------------------------------------------------------------------------------------------------------------------------------------------------------------------------------------------------------------------------------------------------------------------------------------------------------------------------------------------------------------------------------------------------------------------------------------------------------------------------|
| <p>QUESTION:</p> <p>Allen has a LOT of money. He has \$n\$ dollars in the bank. For security reasons, he wants to withdraw it in cash (we will not disclose the reasons here). The denominations for dollar bills are \$1\$, \$5\$, \$10\$, \$20\$, \$100\$. What is the minimum number of bills Allen could receive after withdrawing his entire balance?</p> <p>----Input----</p> <p>The first and only line of input contains a single integer \$n\$ (\$1 \le n \le 10^9\$).</p> <p>----Output----</p> <p>Output the minimum number of bills that Allen could receive.</p> <p>----Examples----</p> <p>Input<br/>125</p> <p>Output<br/>3</p> <p>Input<br/>43</p> <p>Output<br/>5</p> <p>Input<br/>1000000000</p> <p>Output<br/>100000000</p> <p>----Note----</p> <p>In the first sample case, Allen can withdraw this with a \$100\$ dollar bill, a \$20\$ dollar bill, and a \$5\$ dollar bill. There is no way for Allen to receive \$125\$ dollars in one or two bills.</p> <p>In the second sample case, Allen can withdraw two \$20\$ dollar bills and three \$1\$ dollar bills.</p> <p>In the third sample case, Allen can withdraw \$100000000\$ (ten million!) \$100\$ dollar bills.</p> <p>Use Standard Input format</p> <p>ANSWER:</p> | <p>Input: 125<br/>Output: 3</p> <p>Input: 43<br/>Output: 5</p> <p>...</p> <p>Ground-truth Program</p> <pre> 1 n = int(input()) 2 3 ans = 0 4 ans += n//100 5 n %= 100 6 ans += (n // 20) 7 n %= 20 8 ans += n // 10 9 n %= 10 10 ans += n // 5 11 n %= 5 12 ans += n // 1 13 14 print(ans) </pre>                                                                                                                                                                                                                                                                                                                         | <p>Input: 74<br/>Output: 8</p> <p>Input: 82655<br/>Output: 830</p> <p>...</p> <p>CodeT5 Output Program</p> <pre> 1 n = int(input()) 2 3 a = defaultdict(int) 4 5 for i in range(1, 101): 6     a[i] = n // i 7     n = n % i 8 9 ans = 0 10 for i in range(1, 101): 11     if n &lt; a[i]: 12         ans += a[i] 13         n -= a[i] 14 15 print(ans) </pre> <p>FAILED TESTS</p>                                                                                                                                                                                                                              |
|                                                                                                                                                                                                                                                                                                                                                                                                                                                                                                                                                                                                                                                                                                                                                                                                                                                                                                                                                                                                                                                                                                                                                                                                                                                    | <p>CodeRL+CodeT5 Output Program (before CS)</p> <pre> 1 def main(): 2     n = int(input()) 3     cnt = 0 4     while n &gt; 0: 5         if n % 100 == 0: 6             n -= 100 7             cnt += 1 8         elif n % 20 == 0: 9             n -= 20 10            cnt += 1 11        elif n % 5 == 0: 12            n -= 5 13            cnt += 1 14        elif n % 10 == 0: 15            n -= 10 16            cnt += 1 17        elif n &gt; 0: 18            n -= 1 19            cnt += 1 20    print(cnt) 21 22 23 def __starting_point(): 24     main() 25 26 __starting_point() </pre> <p>FAILED TESTS</p> | <p>CodeRL+CodeT5 Output Program (after CS)</p> <pre> 1 def main(): 2     n = int(input()) 3     cnt = 0 4     while n &gt; 0: 5         if n % 100 == 0: 6             n -= 100 7             cnt += 1 8         elif n % 20 == 0: 9             n -= 20 10            cnt += 1 11        elif n % 10 == 0: 12            n -= 10 13            cnt += 1 14        elif n % 5 == 0: 15            n -= 5 16            cnt += 1 17        else: 18            n -= 1 19            cnt += 1 20    print(cnt) 21 22 23 def __starting_point(): 24     main() 25 26 __starting_point() </pre> <p>PASSED TESTS</p> |

Figure 7: An example of an interview-level program from the APPS benchmark and corresponding programs generated by CodeT5 variants

## References

- J. Austin, A. Odena, M. Nye, M. Bosma, H. Michalewski, D. Dohan, E. Jiang, C. Cai, M. Terry, Q. Le, et al. Program synthesis with large language models. *arXiv preprint arXiv:2108.07732*, 2021.
- D. Bahdanau, P. Brakel, K. Xu, A. Goyal, R. Lowe, J. Pineau, A. Courville, and Y. Bengio. An actor-critic algorithm for sequence prediction. *arXiv preprint arXiv:1607.07086*, 2016.
- D. Hendrycks, S. Basart, S. Kadavath, M. Mazeika, A. Arora, E. Guo, C. Burns, S. Puranik, H. He, D. Song, and J. Steinhardt. Measuring coding challenge competence with apps. *NeurIPS*, 2021.
- H. Husain, H. Wu, T. Gazit, M. Allamanis, and M. Brockschmidt. Codesearchnet challenge: Evaluating the state of semantic code search. *CoRR*, abs/1909.09436, 2019.
- I. Loshchilov and F. Hutter. Decoupled weight decay regularization. In *ICLR (Poster)*. OpenReview.net, 2019.
- S. Lu, D. Guo, S. Ren, J. Huang, A. Svyatkovskiy, A. Blanco, C. B. Clement, D. Drain, D. Jiang, D. Tang, G. Li, L. Zhou, L. Shou, L. Zhou, M. Tufano, M. Gong, M. Zhou, N. Duan, N. Sundaresan,



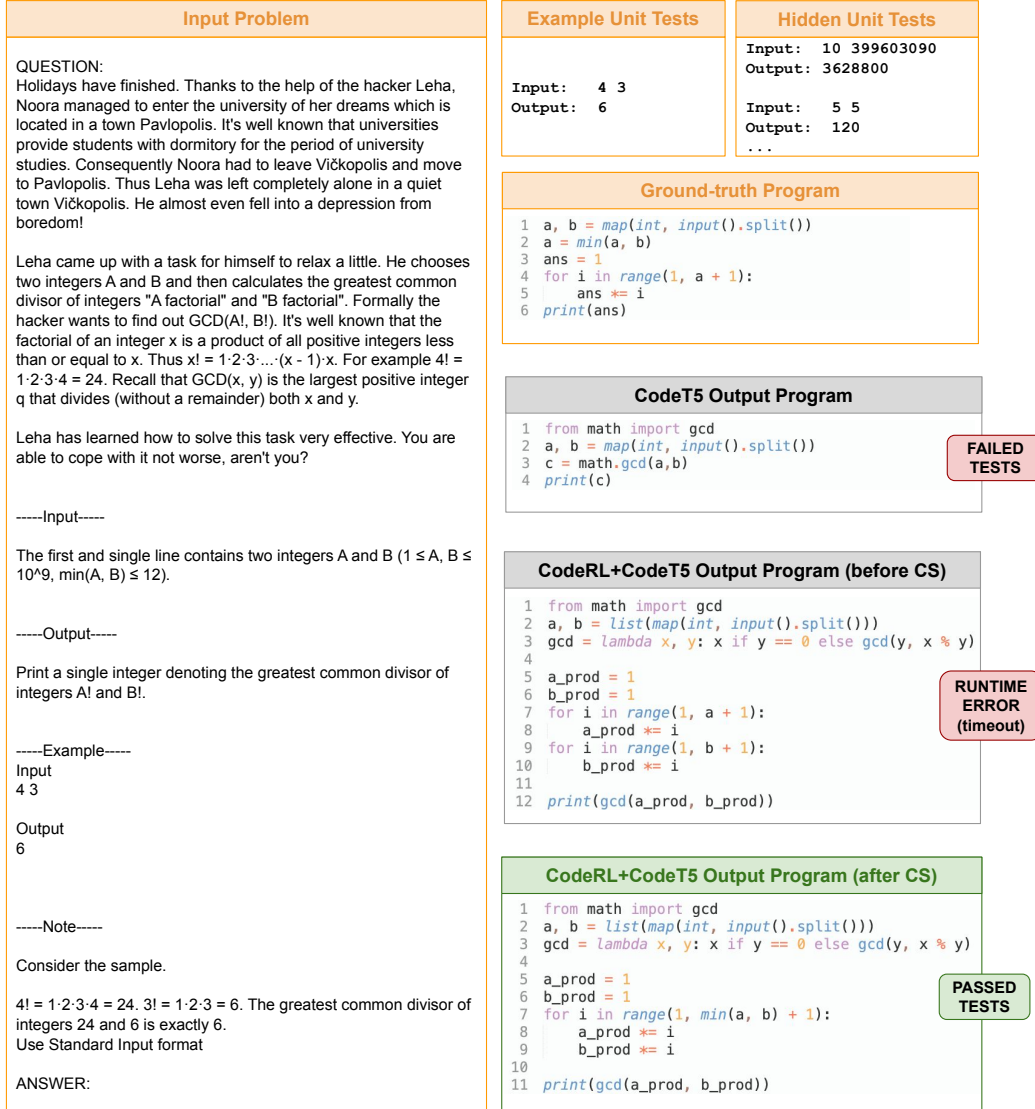

Figure 8: An example of an interview-level program from the APPS benchmark and corresponding programs generated by CodeT5 variants

- 179 S. K. Deng, S. Fu, and S. Liu. Codexglue: A machine learning benchmark dataset for code  
180 understanding and generation. In *NeurIPS Datasets and Benchmarks*, 2021.
- 181 K. Papineni, S. Roukos, T. Ward, and W.-J. Zhu. Bleu: a method for automatic evaluation of machine  
182 translation. In *Proceedings of the 40th annual meeting on association for computational linguistics*,  
183 pages 311–318. Association for Computational Linguistics, 2002.
- 184 S. Ren, D. Guo, S. Lu, L. Zhou, S. Liu, D. Tang, N. Sundaresan, M. Zhou, A. Blanco, and S. Ma.  
185 Codebleu: a method for automatic evaluation of code synthesis. *arXiv preprint arXiv:2009.10297*,  
186 2020.
- 187 S. J. Rennie, E. Marcheret, Y. Mroueh, J. Ross, and V. Goel. Self-critical sequence training for image  
188 captioning. In *Proceedings of the IEEE conference on computer vision and pattern recognition*,  
189 pages 7008–7024, 2017.

- 190 B. Wang and A. Komatsuzaki. GPT-J-6B: A 6 Billion Parameter Autoregressive Language Model.  
191 <https://github.com/kingoflolz/mesh-transformer-jax>, May 2021.
- 192 X. Wang, W. Chen, J. Wu, Y.-F. Wang, and W. Y. Wang. Video captioning via hierarchical rein-  
193 forcement learning. In *Proceedings of the IEEE Conference on Computer Vision and Pattern*  
194 *Recognition*, pages 4213–4222, 2018.
- 195 Y. Wang, W. Wang, S. R. Joty, and S. C. H. Hoi. Codet5: Identifier-aware unified pre-trained  
196 encoder-decoder models for code understanding and generation. In *EMNLP (1)*, pages 8696–8708.  
197 Association for Computational Linguistics, 2021.
